# Supplementary material
Source: PubMed Central journal article supplement (PMC9768074)

# Fig. s1

Loading MW standard (single well)  
or human heart homogenate (all  
other wells)

SDS-PAGE (10% gel)

Transfer onto nitrocellulose

Cutting membrane to strips  
(aided by Ponceau staining)

Blocking nonspecific binding sites  
(non-fat milk 5%)

Placing strips into individual trays  
for separate incubations

Incubation with human  
Serum (1:1,000)

Collecting strips into a single tray  
for further incubations

Incubation with Peroxidase labelled anti-  
human IgG (1:25,000) or IgM (1:10,000)

Placing strips to reconstitute  
original membrane

Enhanced Chemiluminescence (ECL) reaction

Recording by digital camera

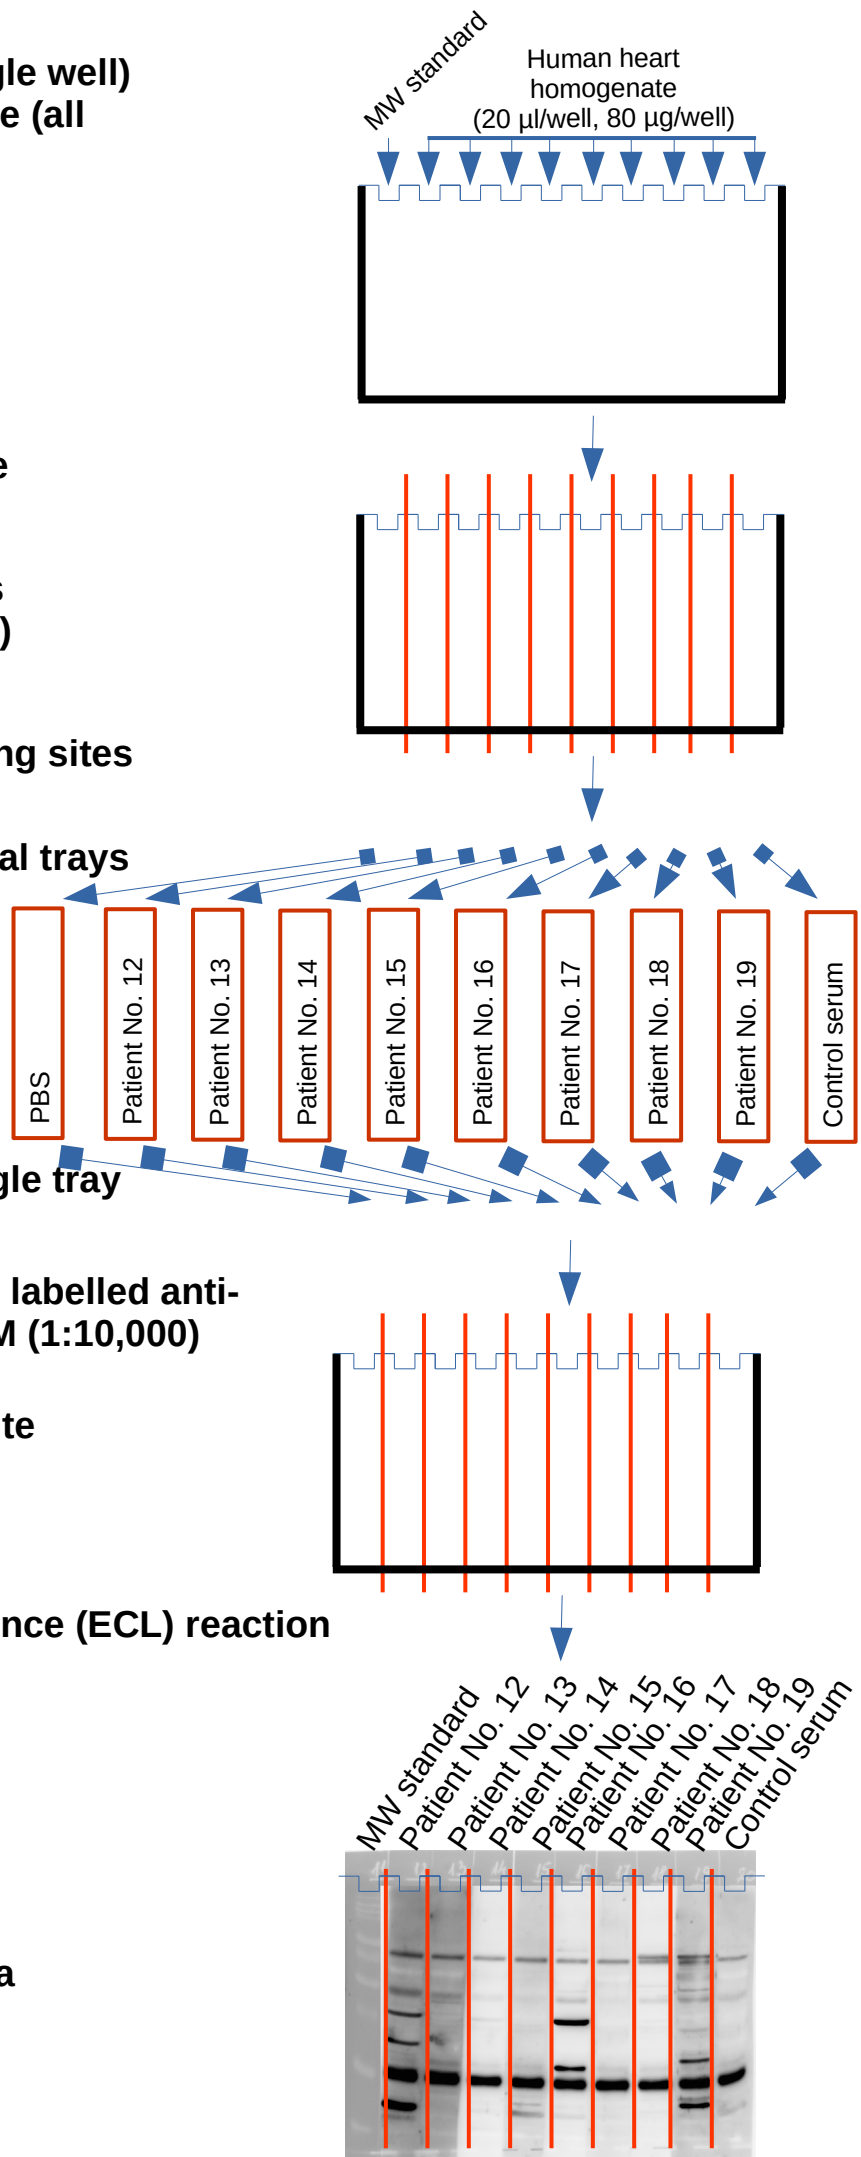

Supplement: 11357_2022_649_MOESM1_ESM.pdf [file 11357_2022_649_MOESM1_ESM.pdf]
